# Supplementary material
Source: Elsevier journal article supplement (https://www.sciencedirect.com/science/article/pii/S1136103420300356)
Supplement: mmc1 [file S1136103420300356:mmc1.doc]

Documento Suplementario 1

**Lista de Comprobación de Estrategias y Técnicas Aplicadas en las Unidades Didácticas**

| Tema |  | |
| --- | --- | --- |
| Periodo histórico |  | |
| Etapa |  | |
| Curso/nivel |  | |
|  | **Sí** | **No** |
| ¿Ha utilizado recursos digitales? |  |  |
| ¿Ha utilizado técnicas cooperativas? |  |  |
| ¿Ha utilizado actividades de indagación? |  |  |
| ¿Ha utilizado coloquios y debates? |  |  |
| ¿Ha utilizado el portfolio o trabajos de clase para evaluar? |  |  |
| ¿Ha utilizado la observación directa a través de rúbricas o fichas de observación? |  |  |
| ¿Ha usado documentos históricos primarios y/o secundarios? |  |  |
| ¿Ha utilizado ejercicios de relevancia histórica? |  |  |
| ¿Ha utilizado ejercicios de causas y consecuencias? |  |  |
| ¿Ha utilizado ejercicios de cambios y permanencias? |  |  |
| ¿Ha utilizado ejercicios de perspectiva o empatía histórica? |  |  |
| ¿Ha utilizado ejercicios sobre dimensión ética de la historia? |  |  |

Documento Suplementario 2 (Anonimizado)

# INFORME DE LA COMISIÓN DE ÉTICA DE INVESTIGACIÓN DE LA

**UNIVERSIDAD DE XXXXXX**

XXXXXXXXXX, Catedrático de Universidad y Secretario de la Comisión de Ética de Investigación de la Universidad de XXXXX,

CERTIFICA:

Que D. XXXXXXXXXX XXXXXXX ha presentado la memoria de trabajo de su Proyecto de Investigación titulado *"Competencias docentes y métodos activos de aprendizaje. Una investigación evaluativa con el profesorado en formación de ciencias sociales"*, a la Convocatoria 2018 "Jóvenes Líderes en Investigación" de la Fundación Séneca.

Que la Comisión de Ética de Investigación de la Universidad de XXXXXXX analizó toda la documentación presentada, y de conformidad con lo acordado el día dieciocho de julio de dos mil diecinueve1, por unanimidad, se emite INFORME FAVORABLE, desde el punto de vista ético de la investigación.

Y para que conste y tenga los efectos que correspondan firmo esta certificación con el visto bueno del Presidente de la Comisión.

Vº Bº

EL PRESIDENTE DE LA COMISIÓN DE ÉTICA DE INVESTIGACIÓN DE LA UNIVERSIDAD DE XXXXX

Fdo.: XXXXXXXXXXX

ID: 2453/2019


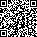
1A los efectos de lo establecido en el art. 19.5 de la Ley 40/2015 de 1 de octubre de Régimen Jurídico del
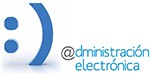
 Sector Público (B.O.E. 02-10), se advierte que el acta de la sesión citada está pendiente de aprobación

Documento Suplementario 3 (Anonimizado)

| **ANEXO I** |
| --- |

# DECLARACIÓN DE CONSENTIMIENTO INFORMADO

D./Dña …………………………………, de ….. años de edad y con DNI nº ………………….., manifiesta que ha sido informado/a sobre los beneficios que podría suponer mi participación para cubrir los objetivos del Proyecto de Investigación titulado **“Conceptos metodológicos y métodos activos de aprendizaje para la mejora de las competencias docentes del profesorado (METACOM)**”, dirigido por Dr. XXXXXXX y Dr.XXXXXXXXXX.

La investigación se desarrolla en la Facultad de Educación de la Universidad de XXXXXX y cuenta con el certificado del Comité Ético de esta institución.

El objetivo de este estudio es analizar las posibles mejoras de un programa de intervención sobre educación histórica en educación secundaria.

Teléfono de contacto: XXXXXXXXX

Correo electrónico: [XXXXXX](mailto:pedromir@um.es)XXXXXX

He sido informado/a de los posibles perjuicios que la participación en dicho proyecto puede tener sobre mi bienestar y salud al haber leído la hoja de información al participante sobre el estudio citado.

He sido también informado/a de que mis datos personales serán sometidos a tratamiento en virtud de su consentimiento con fines de investigación científica por la Universidad de Murcia. El plazo de conservación de los datos será el mínimo indispensable para asegurar la realización del estudio o proyecto. No obstante, mis datos identificativos, para garantizar condiciones óptimas de privacidad, y cuando el procedimiento del estudio lo permita, podrían ser sometidos a anonimización o seudoanonimización. En todo caso, la información identificativa que se pudiese recabar será eliminada cuando no sea necesaria.

He sido informado/a de que para cualquier consulta relativa al tratamiento de sus datos personales en este estudio o para solicitar el acceso, rectificación, supresión, limitación u oposición al tratamiento podré dirigirme a la dirección [protecciondedatos@um.es. Asimismo](mailto:protecciondedatos@um.es.Asimismo) he sido informado/a de mi derecho a presentar un reclamación ante la Agencia Española de Protección de Datos.

He sido también informado que puedo abandonar en cualquier momento mi participación en el estudio sin dar explicaciones y sin que ello me suponga perjuicio alguno.

Se me ha entregado una hoja de información al participante y una copia de este consentimiento informado, fechado y firmado.

Tomando ello en consideración, **otorgo** mi **consentimiento** a que esta recogida de datos tenga lugar y sea utilizada para cubrir los objetivos especificados en el proyecto.

***Nota: para aquellos casos en los que el sujeto participante sea menor de edad, persona en situación de discapacidad, o persona necesitada de especial protección**[[1]](#footnote-1)**, se hará constar lo siguiente:**

“Hago constar que he explicado las características y el objetivo del estudio, sus riesgos y beneficios potenciales a la persona responsable por la tutela del participante, que dicho participante ha sido informado de acuerdo a sus capacidades y que no hay oposición por su parte. El responsable legal[[2]](#footnote-2) otorga su consentimiento por medio de su firma fechada en este documento. **(El menor, persona en situación de discapacidad o persona necesitada de especial protección firmará su asentimiento cuando por su edad y madurez sea posible).**

**(Firma del investigador o la persona que proporciona la información y la hoja de consentimiento informado)**

XXX, a XX de XXXXX de 2019.

Fdo. D/Dña

1. Art. 25 del Código Penal (Ley Orgánica 1/2015) [↑](#footnote-ref-1)
2. En caso de ser menor de edad, deberá acompañarse en todo caso del consentimiento informado expreso de ambos padres. Con carácter general, para el caso de menores, deberá recogerse la firma de ambos padres (o progenitores); en caso de firmar uno solo, indicará expresamente que el otro también ha sido informado y consiente en la participación del menor. [↑](#footnote-ref-2)
